# Supplementary material for: Genome Sequence of Trichoderma lixii MUT3171, A Promising Strain for Mycoremediation of PAH-Contaminated Sites
Source: PubMed Central journal article supplement (PMC7570066; doi:10.3390/microorganisms8091258), 2020-08-20
Supplement: microorganisms-08-01258-s001.pdf [file microorganisms-08-01258-s001.pdf]

**Table S1. Pollutant concentration:** List of the compounds detected in the contaminated soil, in which *Trichoderma lixii* MUT3171 was isolated. The concentration is expressed in mg/kg of dry soil. TPH: total petroleum hydrocarbons.

| Pollutant                | Concentration |
|--------------------------|---------------|
| 2-metilnaphthalene       | 50.00         |
| 1-metilnaphthalene       | 28.26         |
| naphthalene              | 62.81         |
| acenaphtilene            | 0.44          |
| acenaphthene             | 10.96         |
| fluorene                 | 11.83         |
| phenanthrene             | 96.28         |
| anthracene               | 6.67          |
| fluoranthene             | 51.01         |
| pyrene                   | 32.91         |
| benzo(a)anthracene       | 10.11         |
| chrysene                 | 5.97          |
| benzo(b+j)fluoranthene   | 3.96          |
| benzo(k)fluoranthene     | 1.50          |
| benzo(a)pyrene           | 1.93          |
| indeno[1,2,3-cd]pyrene   | 1.24          |
| dibenzo(ac+ah)anthracene | 0.32          |
| benzo(ghi)perylene       | 1.02          |
| dibenzo(al)pyrene        | 0.50          |
| dibenzo(ae)pyrene        | 0.14          |
| dibenzo(ai)pyrene        | 0.05          |
| dibenzo(ah)pyrene        | <0.01         |
| TPHs                     | 377.91        |

**Table S2. Strains used for comparison:** List of *Trichoderma* species used in the comparative analysis, with relative GenBank accessions and references.

| Species                                       | Accession       | References |
|-----------------------------------------------|-----------------|------------|
| <i>Trichoderma guizhouense</i> NJAU 4742      | GCA_002022785.1 | [1]        |
| <i>Trichoderma harzianum</i> CBS 226 95       | GCA_003025095.1 | [2]        |
| <i>Trichoderma harzianum</i> TR274            | GCA_002838845.1 | [3]        |
| <i>Trichoderma harzianum</i> T6776            | GCA_000988865.1 | [4]        |
| <i>Trichoderma arundinaceum</i> IBT40837      | GCA_003012105.1 | [5]        |
| <i>Trichoderma asperellum</i> CBS 433 97      | GCA_003025105.1 | [2]        |
| <i>Trichoderma citrinoviride</i> TUCIM 6016   | GCA_003025115.1 | [2]        |
| <i>Trichoderma gamsii</i> T6085               | GCA_001481775.2 | [2]        |
| <i>Trichoderma longibrachiatum</i> ATCC 18648 | GCA_003025155.1 | [2]        |
| <i>Trichoderma parareesei</i> CBS 125925      | GCA_001050175.1 | [6]        |
| <i>Trichoderma reesei</i> QM6a                | GCA_000167675.2 | [7]        |
| <i>Trichoderma virens</i> Gv29 8              | GCA_000170995.2 | [8]        |
| <i>Trichoderma harzianum</i> TR1              | GCA_002894145.1 | [9]        |

## References

- Meng, X.; Miao, Y.; Liu, Q.; Ma, L.; Guo, K.; Liu, D.; Ran, W.; Shen, Q. TgSWO from *Trichoderma guizhouense* NJAU4742 promotes growth in cucumber plants by modifying the root morphology and the cell wall architecture. *Microb. Cell Factories* **2019**, *18*, 148–15, doi:10.1186/s12934-019-1196-8.
- Druzhinina, I.S.; Chenthamara, K.; Zhang, J.; Atanasova, L.; Yang, D.; Miao, Y.; Rahimi, M.J.; Grujic, M.; Cai, F.; Pourmehdi, S.; et al. Massive lateral transfer of genes encoding plant cell wall-degrading enzymes to the mycoparasitic fungus *Trichoderma* from its plant-associated hosts. *PLoS Genet.* **2018**, *14*, e1007322, doi:10.1371/journal.pgen.1007322.
- Steindorff, A.S.; Ramada, M.H.S.; Coelho, A.S.; Miller, R.N.G.; Pappasjr, G.J.; Ulhoa, C.J.; Noronha, E.F. Identification of mycoparasitism-related genes against the phytopathogen *Sclerotinia sclerotiorum* through transcriptome and expression profile analysis in *Trichoderma harzianum*. *BMC Genom.* **2014**, *15*, 204, doi:10.1186/1471-2164-15-204.
- Baroncelli, R.; Zapparata, A.; Piaggieschi, G.; Sarrocco, S.; Vannacci, G. Draft whole-genome sequence of *Trichoderma gamsii* T6085, a promising biocontrol agent of *Fusarium* head blight on wheat. *Genome Announc.* **2016**, *4*, 4, doi:10.1128/genomea.01747-15.
- Proctor, R.H.; McCormick, S.P.; Kim, H.-S.; Cardoza, R.E.; Stanley, A.M.; Lindo, L.; Kelly, A.; Brown, D.W.; Lee, T.; Vaughan, M.M.; et al. Evolution of structural diversity of trichothecenes, a family of toxins produced by plant pathogenic and entomopathogenic fungi. *PLOS Pathog.* **2018**, *14*, e1006946, doi:10.1371/journal.ppat.1006946.
- Baroncelli, R.; Piaggieschi, G.; Fiorini, L.; Bertolini, E.; Zapparata, A.; Pè, M.E.; Sarrocco, S.; Vannacci, G. Draft whole-genome sequence of the biocontrol agent *Trichoderma harzianum* T6776. *Genome Announc.* **2015**, *3*, 3, doi:10.1128/genomea.00647-15.
- Yang, D.; Pomraning, K.R.; Kopchinskiy, A.; Aghcheh, R.K.; Atanasova, L.; Chenthamara, K.; Baker, S.E.; Zhang, R.; Shen, Q.; Freitag, M.; et al. Genome sequence and annotation of *Trichoderma parareesei*, the ancestor of the cellulase producer *Trichoderma reesei*. *Genome Announc.* **2015**, *3*, doi:10.1128/genomea.00885-15.
- Martinez, D.; Berka, R.M.; Henrissat, B.; Saloheimo, M.; Arvas, M.; Baker, S.E.; Chapman, J.; Chertkov, O.; Coutinho, P.M.; Cullen, D.; et al. Genome sequencing and analysis of the biomass-degrading fungus *Trichoderma reesei* (syn. *Hypocrea jecorina*). *Nat. Biotechnol.* **2008**, *26*, 553–560, doi:10.1038/nbt1403.
- Kubicek, C.P.; Herrera-Estrella, A.; Seidl, V.; A Martinez, D.; Druzhinina, I.S.; Thon, M.R.; Zeilinger, S.; Casas-Flores, S.; Horwitz, B.A.; Mukherjee, P.K.; et al. Comparative genome sequence analysis underscores mycoparasitism as the ancestral life style of *Trichoderma*. *Genome Boil.* **2011**, *12*, R40, doi:10.1186/gb-2011-12-4-r40.
- Gardiner, D.; Vos, C.; Kazan, K.; Harvey, P. Commonwealth Scientific and Industrial Research Organisation, Queensland, Australia. Unpublished Work. **2018**.
